# Supplementary material for: ANRIL promotes chemoresistance via disturbing expression of ABCC1 by regulating the expression of Let-7a in colorectal cancer
Source: PubMed Central journal article supplement (PMC6246772; doi:10.1042/bsr20180620), 2018-11-21
Supplement: bsr20180620_Supp1.pdf [file bsr20180620_Supp1.pdf]

**ANRIL promotes chemoresistance via disturbing expression  
of ABCC1 by regulating the expression of Let-7a in  
colorectal cancer**

Zhen Zhang<sup>1#</sup>, Lifeng Feng<sup>2#</sup>, Pengfei Liu<sup>3\*</sup>, Wei Duan<sup>4\*</sup>

<sup>1</sup> The Department of Gerontology, Yeda Hospital of Yantai City, Yantai, China.

<sup>2</sup> The Department of general surgery, Shangluo Central Hospital, Shangluo, China.

<sup>3</sup> The Department of Gastroenterology, Yan'an University Affiliated Hospital, Yan'an, China.

<sup>4</sup> The Department of Oncology, Yan'an University Affiliated Hospital, Yan'an, China.

# Contribute equally to this work

**\*Corresponding author:** Wei Duan, Department of Oncology, Yan'an University Affiliated Hospital, Yanan University, NO.43, North Main Street, Baota District, Yan'an 716000, Shaanxi Province, China. Tel: +86-13289647254; Email: [duanwei1976dw@163.com](mailto:duanwei1976dw@163.com)

Or Pengfei Liu, The Department of Gastroenterology, Yan'an University Affiliated Hospital, NO.43, North Main Street, Baota District, Yan'an 716000, Shaanxi Province, China. Tel: +86-13891121986; Email: [lpf19780103@163.com](mailto:lpf19780103@163.com).

Supplementary Figure S1

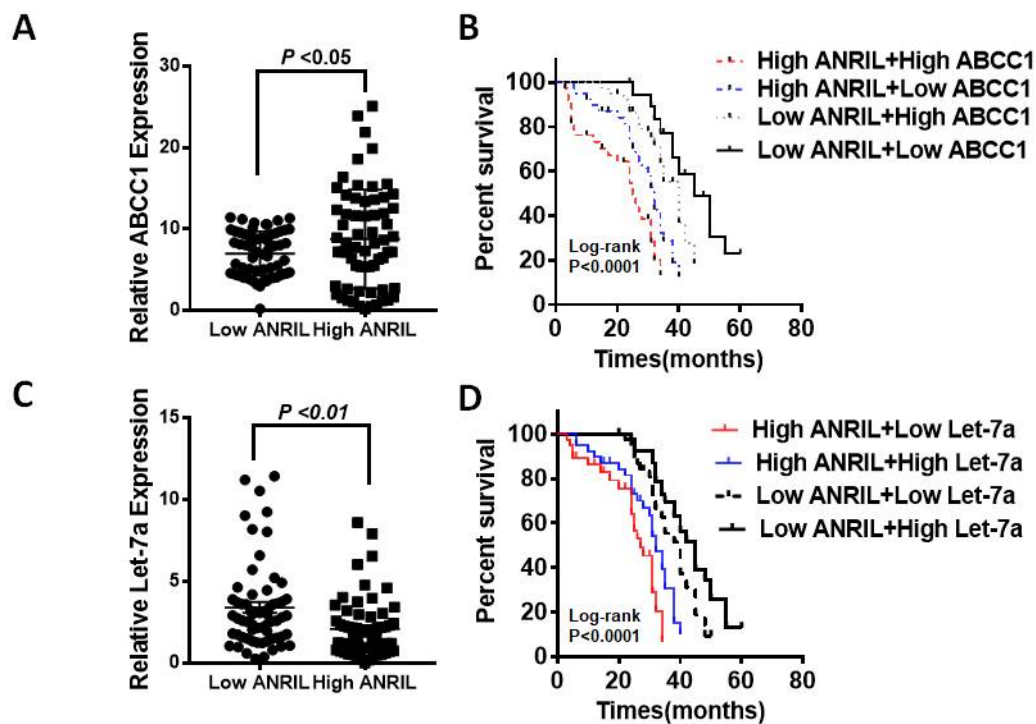

Suppl. Figure S1. The expression of ABCC1 and Let-7a in tissues samples. (A) The expression of ABCC1 in tissues samples. (B) The association of ABCC1 expression in the high level ANRIL group and low level ANRIL group with overall survival. (C) The expression of Let-7a in tissues samples. (D) The association of Let-7a expression in the high level ANRIL group and low level ANRIL group with overall survival.

Supplementary Table S1

Table S1. Primers used for real-time RT-PCR and the sequence of si-ANRIL

|             | Sequence                  |                         |
|-------------|---------------------------|-------------------------|
|             | Forwards primers          | Reverse primers         |
| ANRIL       | TGCTCTATCCGCCAATCAGG      | GGCCTCAGTGGCACATACC     |
| ABCC1       | AAGGAGGTACTAGGTGGGCTT     | CCAGTAGGACCCTTCGAGC     |
| ABCC5       | GAACTCGACCGTTGGAATGC      | TCATCCAGGATTCTGAGCTGAG  |
| miR-let-7a  | TGAGGTAGTAGGTTGTATAGTTAAA | AACGAGACGACGACAGACTTT   |
| U6          | CTCGCTTCGGCAGCACA         | AACGCTTCACGAATTTGCGT    |
| GAPDH       | GGAGCGAGATCCCTCCAAAAT     | GGCTGTTGTCATACTTCTCATGG |
|             | Sequence                  |                         |
| si-h-ANRIL1 | GGAATGAGGAGCACAGTGA       |                         |
| si-h-ANRIL2 | CAGAAAGAGAGAAGTTAAA       |                         |
| si-h-ANRIL3 | GGAGAAACAATTCAAGATA       |                         |
